# Supplementary material for: Long-term effects of silver nanoparticles (NM-300K) and soil amendments on soil respiration and mesofauna in a semi-field experiment
Source: Royal Society of Chemistry journal article supplement (doi:10.1039/d2en00730d), 2023-01-01
Supplement: d2en00730d1.pdf [file d2en00730d1.pdf]

**Long-term effects of silver nanoparticles (NM-300K) and soil  
amendments on soil respiration and mesofauna in a semi-field  
experiment**

Table S1: Record of Plants Observed in the Soil Box during the Field Experiment

| Species                        | Frequency | First appearance |
|--------------------------------|-----------|------------------|
| <i>Artemisia vulgaris</i>      | ++        | after 5 months   |
| <i>Capsella bursa-pastoris</i> | +++       | after 8 months   |
| <i>Chenopodium album</i>       | ++        | after 8 months   |
| <i>Geranium molle</i>          | +         | after 17 months  |
| <i>Holcus lanatus</i>          | ++++      | after 5 months   |
| <i>Matricaria maritima</i>     | +         | after 5 months   |
| <i>Persicaria minus</i>        | +++       | after 5 months   |
| <i>Senecio inaequidens</i>     | +         | after 8 months   |
| <i>Senecio vulgaris</i>        | ++        | after 5 months   |
| <i>Sonchus asper</i>           | ++        | after 5 months   |
| <i>Stellaria media</i>         | ++        | after 5 months   |
| <i>Tanacetum vulgare</i>       | +         | after 17 months  |
| <i>Trifolium repens</i>        | ++        | after 8 months   |

++++ very common; +++ common; ++ several; + few
